# Supplementary material for: Consumers’ Implicit and Explicit Recall, Understanding and Perceptions of Products with Nutrition-Related Messages: An Online Survey
Source: MDPI journal article supplement (doi:10.3390/ijerph17218213), 2020-11-06
Supplement: s1 [file s1]

# Supplementary Materials

**Figure S1.** CONSORT Diagram

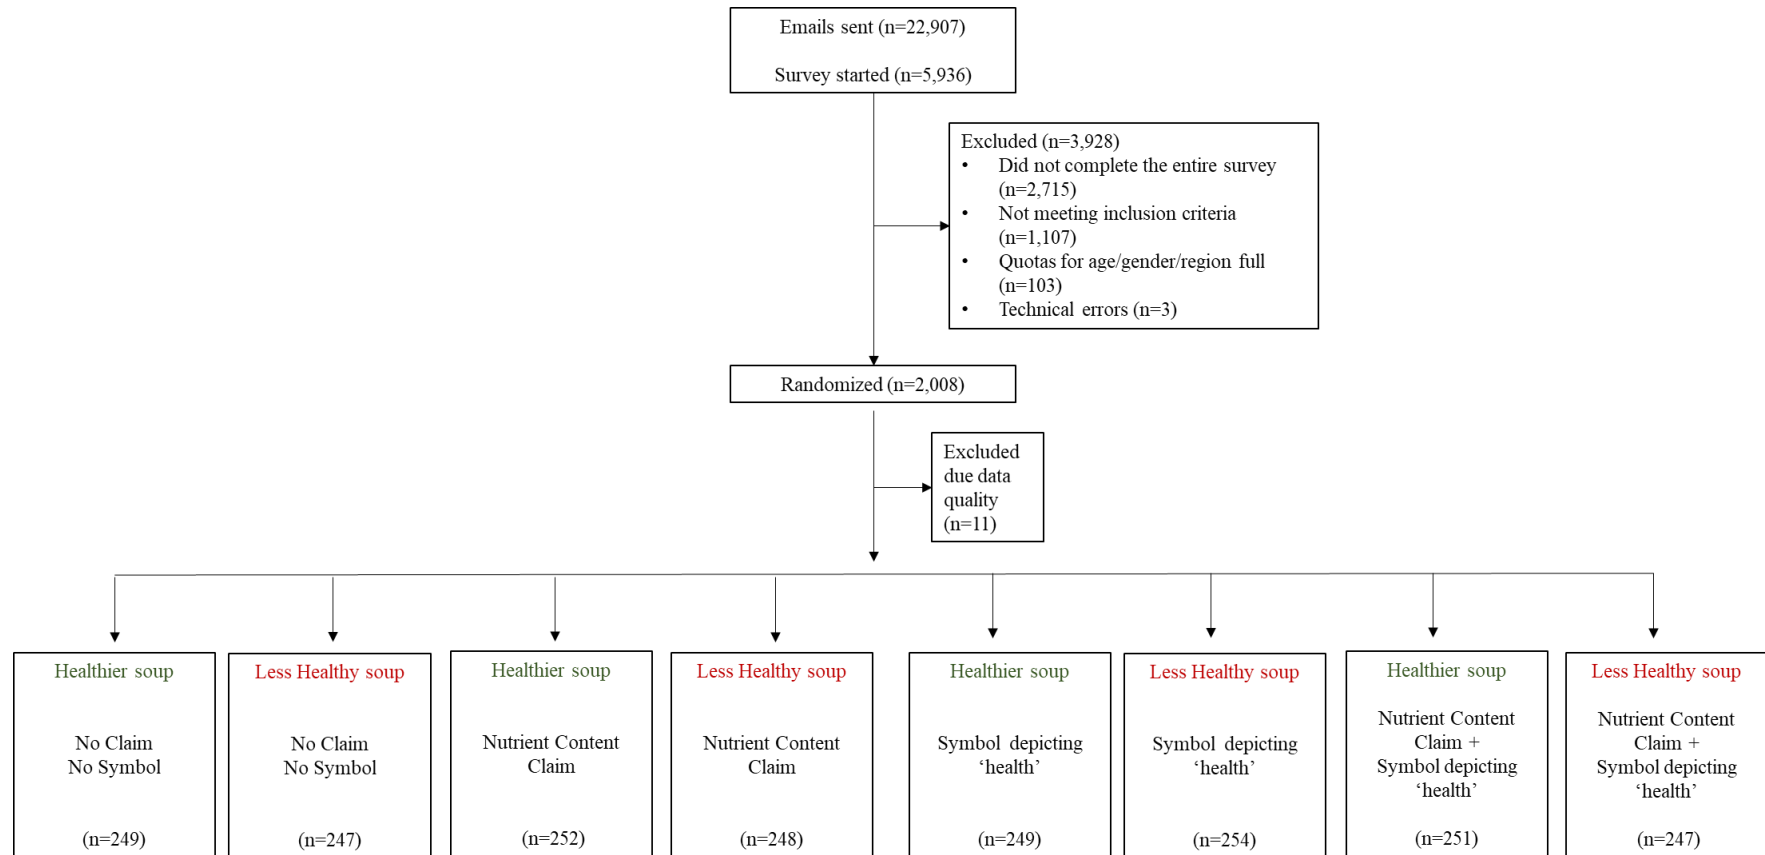

**Table S1.** CONSORT checklist of information to include when reporting a randomized trial

| Section/Topic                    | Item No | Checklist item                                                                                                                                                                              | Reported on page No                                              |
|----------------------------------|---------|---------------------------------------------------------------------------------------------------------------------------------------------------------------------------------------------|------------------------------------------------------------------|
| Title and abstract               | 1a      | Identification as a randomized trial in the title                                                                                                                                           | n/a                                                              |
|                                  | 1b      | Structured summary of trial design, methods, results, and conclusions (for specific guidance see CONSORT for abstracts)                                                                     | Subjects/ Methods                                                |
| Introduction                     |         |                                                                                                                                                                                             |                                                                  |
| Background and objectives        | 2a      | Scientific background and explanation of rationale                                                                                                                                          | Introduction: paragraphs 1–4                                     |
|                                  | 2b      | Specific objectives or hypotheses                                                                                                                                                           | Introduction: paragraph 6                                        |
| Methods                          |         |                                                                                                                                                                                             |                                                                  |
| Trial design                     | 3a      | Description of trial design (such as parallel, factorial) including allocation ratio                                                                                                        | Methods: <i>Experimental design &amp; stimuli</i> paragraph 1    |
|                                  | 3b      | Important changes to methods after trial commencement (such as eligibility criteria), with reasons                                                                                          | Methods: <i>Survey design</i> paragraph 2                        |
| Participants                     | 4a      | Eligibility criteria for participants                                                                                                                                                       | Methods: <i>Survey design</i> paragraph 1                        |
|                                  | 4b      | Settings and locations where the data were collected                                                                                                                                        | Methods: <i>Survey design</i> paragraph 1                        |
| Interventions                    | 5       | The interventions for each group with sufficient details to allow replication, including how and when they were actually administered                                                       | Methods: <i>Experimental design &amp; stimuli</i> paragraphs 1-4 |
| Outcomes                         | 6a      | Completely defined pre-specified primary and secondary outcome measures, including how and when they were assessed                                                                          | Methods: <i>Analyses</i> paragraph 1                             |
|                                  | 6b      | Any changes to trial outcomes after the trial commenced, with reasons                                                                                                                       |                                                                  |
| Sample size                      | 7a      | How sample size was determined                                                                                                                                                              | Methods: <i>Experimental design &amp; stimuli</i> paragraph 1    |
|                                  | 7b      | When applicable, explanation of any interim analyses and stopping guidelines                                                                                                                |                                                                  |
| Randomisation:                   |         |                                                                                                                                                                                             |                                                                  |
| Sequence generation              | 8a      | Method used to generate the random allocation sequence                                                                                                                                      | Methods: <i>Experimental design &amp; stimuli</i> paragraph 1    |
|                                  | 8b      | Type of randomisation; details of any restriction (such as blocking and block size)                                                                                                         | Methods: <i>Experimental design &amp; stimuli</i> paragraph 1    |
| Allocation concealment mechanism | 9       | Mechanism used to implement the random allocation sequence (such as sequentially numbered containers), describing any steps taken to conceal the sequence until interventions were assigned | Methods: <i>Experimental design &amp; stimuli</i> paragraph 1    |
| Implementation                   | 10      | Who generated the random allocation sequence, who enrolled participants, and who assigned participants to interventions                                                                     | Methods: <i>Survey design</i> paragraph 1                        |

|                                                      |     |                                                                                                                                                   |                                                        |
|------------------------------------------------------|-----|---------------------------------------------------------------------------------------------------------------------------------------------------|--------------------------------------------------------|
| Blinding                                             | 11a | If done, who was blinded after assignment to interventions (for example, participants, care providers, those assessing outcomes) and how          |                                                        |
|                                                      | 11b | If relevant, description of the similarity of interventions                                                                                       |                                                        |
| Statistical methods                                  | 12a | Statistical methods used to compare groups for primary and secondary outcomes                                                                     | Methods: <i>Analyses</i> paragraph 1                   |
|                                                      | 12b | Methods for additional analyses, such as subgroup analyses and adjusted analyses                                                                  | Methods: <i>Analyses</i> paragraph 1                   |
| Results                                              |     |                                                                                                                                                   |                                                        |
| Participant flow (a diagram is strongly recommended) | 13a | For each group, the numbers of participants who were randomly assigned, received intended treatment, and were analysed for the primary outcome    | Supplementary material: CONSORT figure 1               |
|                                                      | 13b | For each group, losses and exclusions after randomisation, together with reasons                                                                  | Supplementary material: CONSORT figure 1               |
| Recruitment                                          | 14a | Dates defining the periods of recruitment and follow-up                                                                                           | Methods: <i>Survey design</i> paragraph 1              |
|                                                      | 14b | Why the trial ended or was stopped                                                                                                                |                                                        |
| Baseline data                                        | 15  | A table showing baseline demographic and clinical characteristics for each group                                                                  | Table 1                                                |
| Numbers analysed                                     | 16  | For each group, number of participants (denominator) included in each analysis and whether the analysis was by original assigned groups           | Fig 3                                                  |
| Outcomes and estimation                              | 17a | For each primary and secondary outcome, results for each group, and the estimated effect size and its precision (such as 95% confidence interval) | Table 3, Supplementary material: Supplementary Table 2 |
|                                                      | 17b | For binary outcomes, presentation of both absolute and relative effect sizes is recommended                                                       |                                                        |
| Ancillary analyses                                   | 18  | Results of any other analyses performed, including subgroup analyses and adjusted analyses, distinguishing pre-specified from exploratory         |                                                        |
| Harms                                                | 19  | All important harms or unintended effects in each group (for specific guidance see CONSORT for harms)                                             |                                                        |
| Discussion                                           |     |                                                                                                                                                   |                                                        |
| Limitations                                          | 20  | Trial limitations, addressing sources of potential bias, imprecision, and, if relevant, multiplicity of analyses                                  | Discussion: paragraph 7                                |
| Generalisability                                     | 21  | Generalizability (external validity, applicability) of the trial findings                                                                         | Discussion: paragraph 7                                |
| Interpretation                                       | 22  | Interpretation consistent with results, balancing benefits and harms, and considering other relevant evidence                                     |                                                        |
| Other information                                    |     |                                                                                                                                                   |                                                        |
| Registration                                         | 23  | Registration number and name of trial registry                                                                                                    | Methods: <i>Survey design</i> paragraph 1              |
| Protocol                                             | 24  | Where the full trial protocol can be accessed, if available                                                                                       | Methods: <i>Survey design</i> paragraph 1              |
| Funding                                              | 25  | Sources of funding and other support (such as supply of drugs), role of funders                                                                   | Funding and Conflict of interest paragraphs            |

**Table S2.** Means ratings of perceived nutritional quality (a) and purchase intentions (b) by condition overall and by Nutrition Facts table use (n=1,997)<sup>1,2,3</sup>

| Perceived nutritional quality | All (n=1,755)    |         | Non-NFt Users (n=1,634) |         | NFt Users (n=401) |         |
|-------------------------------|------------------|---------|-------------------------|---------|-------------------|---------|
|                               | Mean             | 95% CI  | Mean                    | 95% CI  | Mean              | 95% CI  |
| No Claim, No Symbol           | 3.1 <sup>a</sup> | 2.9-3.2 | 3.2 <sup>j</sup>        | 3.0-3.5 | 2.6 <sup>z</sup>  | 2.3-3.0 |
| Claim                         | 3.8 <sup>b</sup> | 3.6-4.0 | 4.0 <sup>k</sup>        | 3.7-4.2 | 2.9 <sup>z</sup>  | 2.5-3.4 |
| Symbol                        | 3.0 <sup>a</sup> | 2.9-3.2 | 3.2 <sup>j</sup>        | 3.0-3.4 | 2.7 <sup>z</sup>  | 2.4-3.0 |
| Claim+Symbol                  | 3.8 <sup>b</sup> | 3.6-3.9 | 3.9 <sup>k</sup>        | 3.7-4.2 | 3.1 <sup>z</sup>  | 2.7-3.6 |

  

| Purchase intentions | All (n=1,823)    |         | Non-NFt Users (n=1,699) |         | NFt Users (n=124) |         |
|---------------------|------------------|---------|-------------------------|---------|-------------------|---------|
|                     | Mean             | 95% CI  | Mean                    | 95% CI  | Mean              | 95% CI  |
| No Claim, No Symbol | 2.9 <sup>a</sup> | 2.7-3.1 | 2.9 <sup>j</sup>        | 2.7-3.2 | 2.7 <sup>z</sup>  | 2.1-3.5 |
| Claim               | 3.3 <sup>a</sup> | 3.0-3.5 | 3.3 <sup>k</sup>        | 3.0-3.6 | 2.7 <sup>z</sup>  | 2.1-3.5 |
| Symbol              | 2.8 <sup>a</sup> | 2.6-3.0 | 2.8 <sup>j</sup>        | 2.6-3.0 | 2.3 <sup>z</sup>  | 1.8-3.0 |
| Claim+Symbol        | 3.2 <sup>a</sup> | 3.0-3.5 | 3.3 <sup>k</sup>        | 3.0-3.5 | 2.7 <sup>z</sup>  | 2.1-3.5 |

<sup>1</sup>Adjusted for gender, education, income, ethnicity and health literacy. <sup>2</sup>Means with different superscripts were significantly different (Bonferroni corrections for multiple comparisons, p<0.001). <sup>3</sup>Because the nutritional quality of soups had no effect on recalling the claim, participants were combined into four groups based on the label they were shown: 1) No Claim No Symbol, 2) Nutrient Content Claim, 3) Symbol depicting 'health' and 4) Nutrient Content Claim+Symbol depicting 'health'. CI – Confidence Intervals; NFt – Nutrition Facts table
